# Supplementary material for: PBAT/organoclay composite films—part 2: effect of UV aging on permeability, mechanical properties and biodegradation
Source: Springer Nature journal article supplement (doi:10.1007/s00289-018-2385-z), 2018-05-29
Supplement: MOESM1 [file 15803516]

**PBAT/organoclay composite films. Part 2: Effect of UV aging on permeability, mechanical properties and biodegradation**

Gabriella A. M. Falcão, Tatiara G. Almeida*, Marcelo A. G. Bardi, Laura H. Carvalho, Eduardo L. Canedo

**SUPPLEMENTARY INFORMATION**

**Table S1** Permeability to oxygen and carbon dioxide

| Sample | Aging time  (days) | Permeability (10-6 cm³ STP/cm-h-bar | |
| --- | --- | --- | --- |
| O2 | CO2 |
| PBAT | 0 | 32.2 ± 1.8 | 372.0 ± 13.0 |
| PBAT/1%C20A | 30.9 ± 4.7 | 159.0 ± 26.0 |
| PBAT/5%C20A | 14.2 ± 0.4 | 125.0 ± 8.0 |
| PBAT | 5 | 108.7 ± 4.6 | 476.5 ± 32.0 |
| PBAT/1%C20A | 84.7 ± 3.7 | 197.7 ± 18.3 |
| PBAT/5%C20A | 22.4 ± 0.8 | 130.3 ± 10.2 |
| PBAT | 10 | 178.5 ± 12.4 | 748.2 ± 43.0 |
| PBAT/1%C20A | 148.7 ± 5.0 | 271.5 ± 24.2 |
| PBAT/5%C20A | 43.2 ± 1.2 | 183.5 ± 14.5 |
| PBAT/1%C20A | 20 | 337.2 ± 12.3 | 786.4 ± 9.3 |
| PBAT/5%C20A | 68.3 ± 0.1 | 221.4 ± 12.1 |

**Table S2** Tensile properties of UV-aged PBAT and PBAT/C20A compounds,

| Sample | Aging time (days) | Tensile modulus (MPa) | Tensile strength (MPa) | Elongation at break (%) |
| --- | --- | --- | --- | --- |
| PBAT | 0 | 65.2 ± 5.8 | 23.4 ± 0.8 | 884 ± 39 |
| 5 | 83.8 ± 4.3 | 4.2 ± 0.8 | 8.2 ± 0.8 |
| 10 | 97.8 ± 3.7 | 3.9 ± 1.0 | 6.2 ± 0.1 |
| 20 | 138.1 ± 7.7 | 2.4 ± 0.2 | 5.4 ± 0.8 |
| PBAT/1%C20A | 0 | 83.6 ± 2.6 | 22.0 ± 2.3 | 884 ± 38 |
| 5 | 103.3 ± 4.0 | 5.8 ± 0.6 | 8.3 ± 1.5 |
| 10 | 123.1 ± 8.0 | 3.4 ± 0.5 | 2.9 ± 0.5 |
| 20 | 173.8 ± 10.0 | 2.2 ± 0.4 | 1.7 ± 0.4 |
| PBAT/3%C20A | 0 | 99.1 ± 4.2 | 17.2 ± 1.3 | 839 ± 18 |
| 5 | 113.5 ± 10.6 | 4.8 ± 1.5 | 5.9 ± 0.2 |
| 10 | 174.6 ± 8.7 | 4.6 ± 1.0 | 3.8 ± 1.4 |
| 20 | 265.0 ± 21.0 | 3.6 ± 0.2 | 2.7 ± 0.8 |
| PBAT/5%C20A | 0 | 121.6 ± 9.2 | 14.8 ± 1.2 | 825 ± 39 |
| 5 | 160.3 ± 14.5 | 8.4 ± 1.3 | 11.4 ± 1.4 |
| 10 | 231.9 ± 4.7 | 7.9 ± 0.8 | 10.0 ± 1.2 |
| 20 | 283.7 ± 13.3 | 6.8 ± 0.5 | 6.7 ± 0.7 |

**Table S3** Mass loss as a function of the biodegradation time obtained for the PBAT and PBAT/C20A composites submitted to aging by UV irradiation

| Sample | Aging time (days) | Biodegradation time (weeks) | | | |
| --- | --- | --- | --- | --- | --- |
| 1 | 5 | 7 | 14 |
| PBAT | 0 | 0.16 ± 0.03 | 0.85 ± 0.03 | -1.10 ± 0.17 | -1.20 ± 0.03 |
| 5 | -49.30 ± 3.83 | - | - | - |
| 30 | -62.51 ± 3.44 | - | - | - |
| PBAT/1%C20A | 0 | 0.22 ± 0.05 | 0.89 ± 0.01 | -0.73 ± 0.33 | -1.33 ± 0.06 |
| 5 | -6.72 ± 1.53 | -36.74 ± 3.28 | -54.02 ± 2.39 | - |
| 30 | -28.50 ± 3.86 | - | - | - |
| PBAT/5%C20A | 0 | -0.07 ± 0.13 | 0.88 ± 0.05 | -0.97 ± 0.12 | -2.58 ± 0.03 |
| 5 | 0.84 ± 0.60 | -13.14 ± 0.37 | -26.50 ± 0.55 | - |
| 30 | -7.23 ± 0.55 | -87.91 ± 6.53 | - | - |
